# Supplementary material
Source: publisher site journal article supplement (https://www.dovepress.com/article/supplementary_file/608653/608653%20Supplemental_1.docx)
Supplement: Supplementary file 1 [file 608653%20Supplemental_1.docx]

**Supplemental Table 1. Time from referral to surgery by surgery type**

| **Surgery Type** | **N** | **Median (IQR) (days)** | **Min (days)** | **Max (days)** |
| --- | --- | --- | --- | --- |
| Cataract | 39 | 41 (23, 84) | 1 | 406 |
| Cornea | 2 | 108 (54, 161) | 1 | 214 |
| Glaucoma | 6 | 30 (14, 58) | 3 | 224 |
| Oculoplastics | 3 | 49 (25, 63) | 1 | 76 |
| Retina | 13 | 27 (2, 39) | 1 | 130 |
| **Overall** | **63** | **39 (12, 78)** | **1** | **406** |

IQR: interquartile range (25th to 75th percentile).

Time calculated in days from date of program referral to date of surgery.

Analysis restricted to patients who successfully received surgery.

One eye had a missing referral or surgery date and was excluded from this analysis.

**Supplemental Figure 1. Kaplan-Meier curves for time from referral to surgery by surgery type**


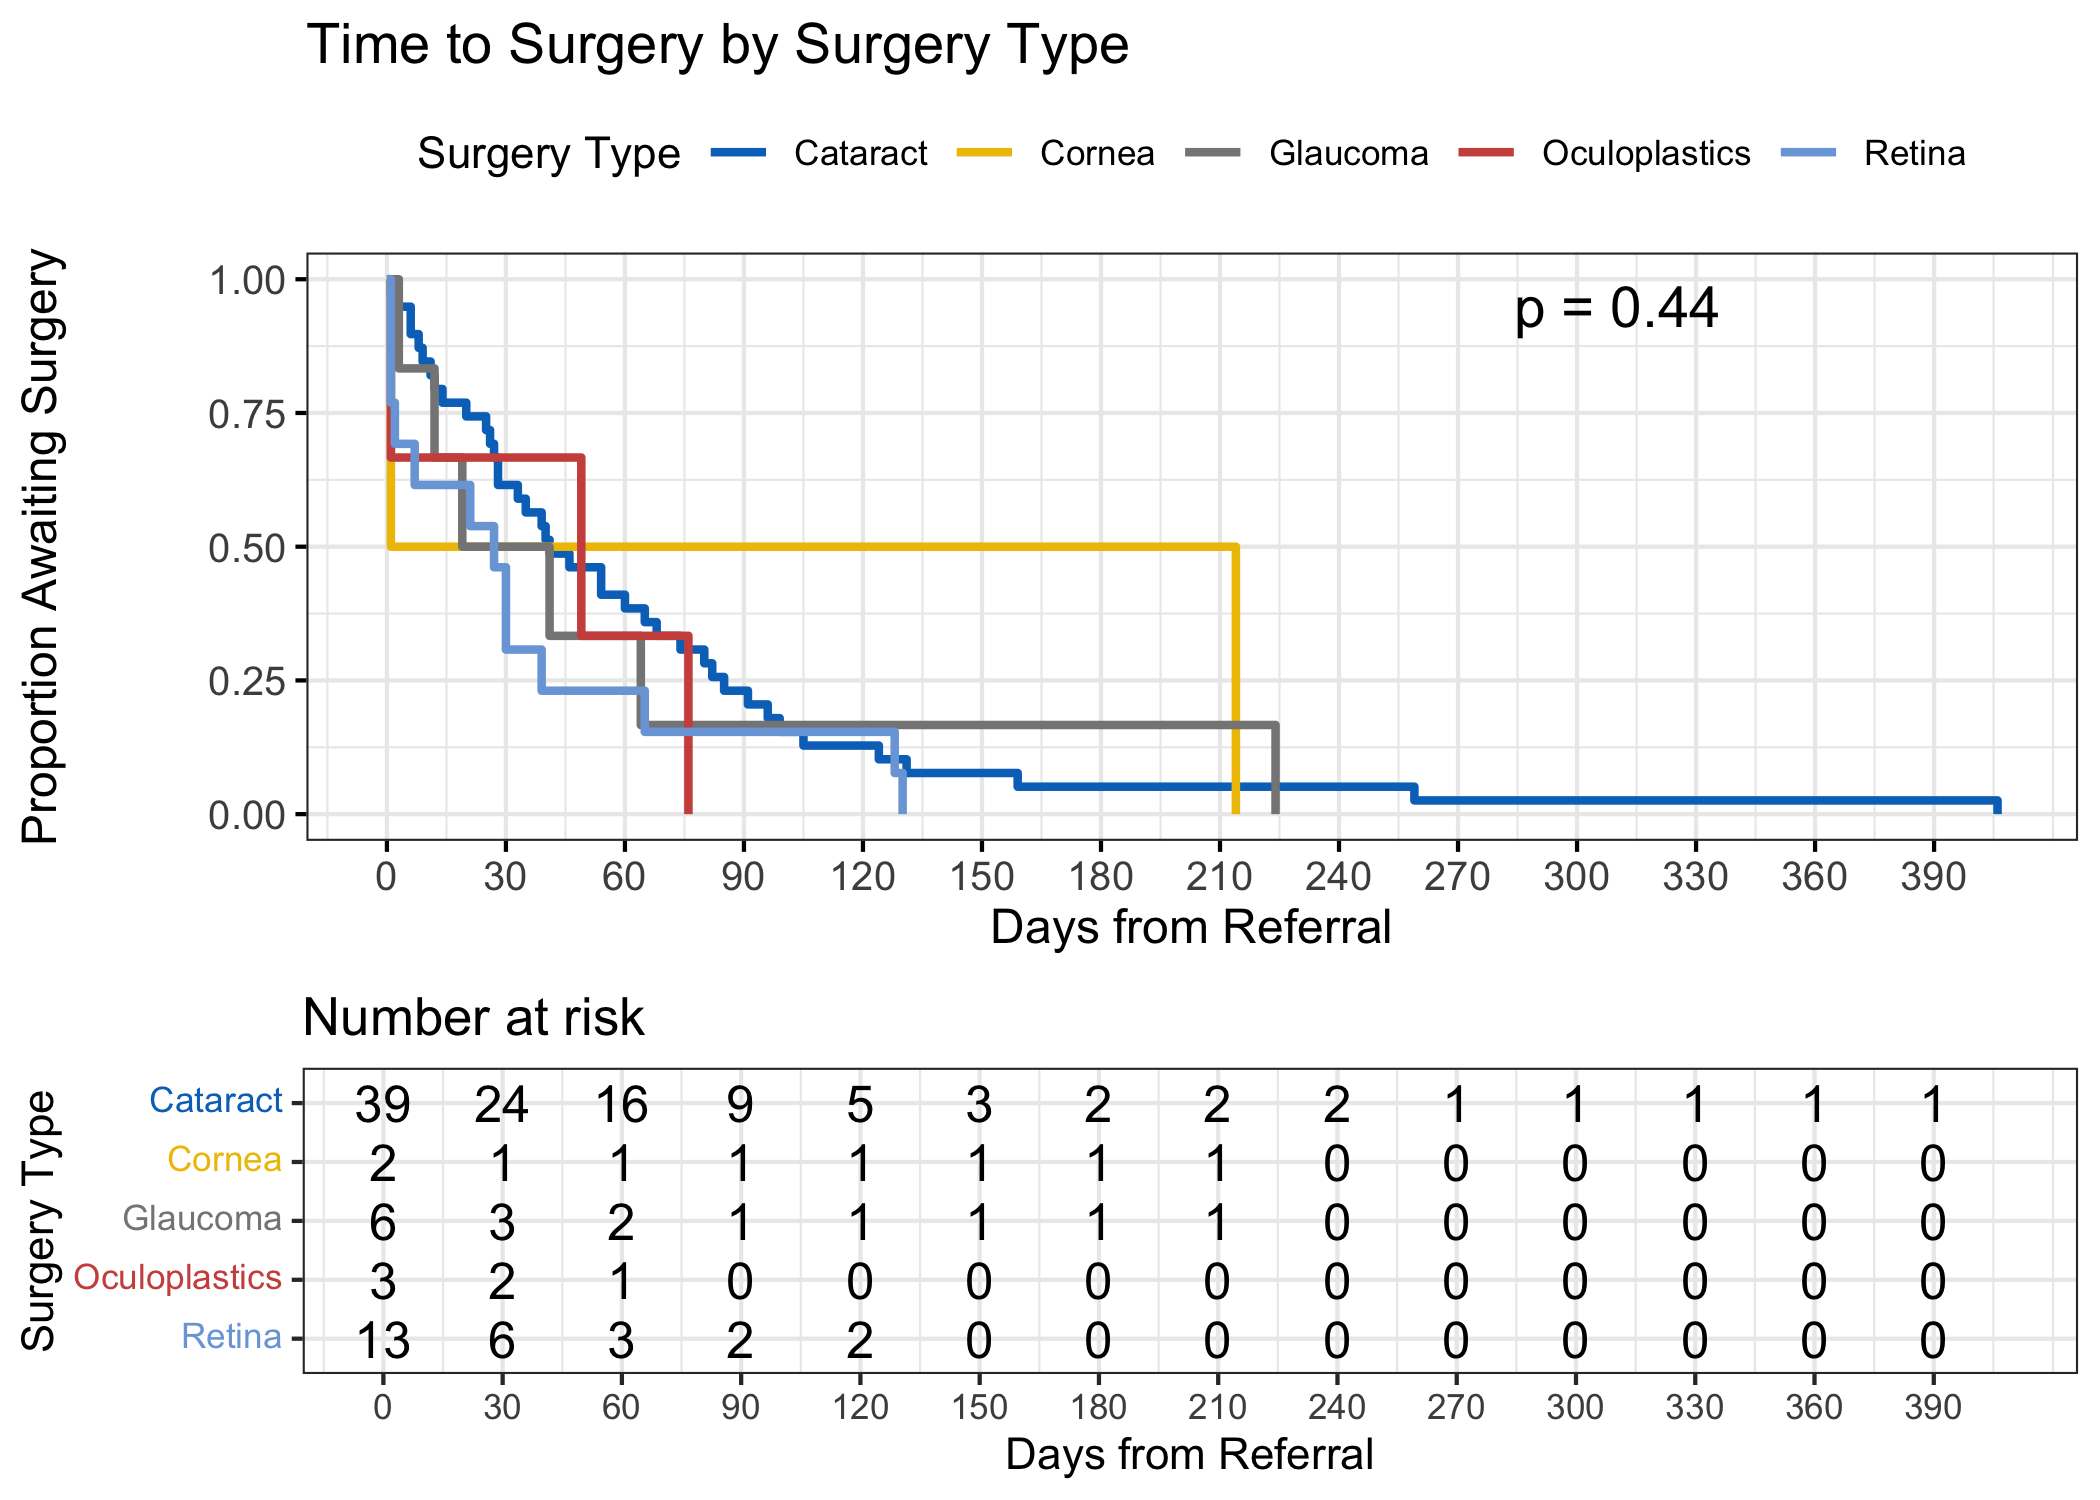


Eyes were treated as the unit of analysis. As some patients contributed both eyes, observations were not fully independent; this limitation should be considered when interpreting these results. p-value from log-rank test
